# Supplementary material for: Evidence-Based Approaches to Anticoagulation in Reconstructive Microsurgery—A Systematic Literature Review
Source: MDPI journal article supplement (doi:10.3390/life14010082), 2024-01-03
Supplement: s1 [file s1]

| 1st Author               | Year of Publication | Recipient Site  | Number of anticoagulants used | Medication/method of administration                                                                                                                                                               | Time of application                                                                                                                                                        | Number of participants/ Flaps                                      | Flap Loss-Total (*) %                           | Hemato-ma (*) %       | Overall Compli-cation Rate (*) %                       |
|--------------------------|---------------------|-----------------|-------------------------------|---------------------------------------------------------------------------------------------------------------------------------------------------------------------------------------------------|----------------------------------------------------------------------------------------------------------------------------------------------------------------------------|--------------------------------------------------------------------|-------------------------------------------------|-----------------------|--------------------------------------------------------|
| Prospective Cohort Study |                     |                 |                               |                                                                                                                                                                                                   |                                                                                                                                                                            |                                                                    |                                                 |                       |                                                        |
| Abdelfattah et al.       | 2020                | Chest           | Total: 1                      | Group 1: NaCl<br>Group 2: Simvastatin<br>Group 3: Simvastatin and ASA                                                                                                                             | daily for 7 days<br>daily for 7 days<br>daily for 7 days                                                                                                                   | Group 1: 12/24<br>Group 2: 12/24<br>Group 3: 12/24                 | (6) 25%<br>(3) 12.5%<br>(2) 8.3%                | 0<br>0<br>1           | N.a.                                                   |
| Chung et al.             | 2016                | Lower extremity | Total: 4                      | Group 1: ASA and heparin<br>Group 2: ASA, heparin and tirofiban<br>Group 3: tirofiban<br>Control group 4: isotonic saline                                                                         | N.a.                                                                                                                                                                       | Group 1: 20<br>Group 2: 20<br>Group 3: 20<br>Group 4: 20           | N.a.                                            | N.a.                  | 30%<br>0%<br>70%<br>80%                                |
| Cox et al.               | 1992                | Lower extremity | Total: 1                      | Control group 1: normal saline<br>Group 2: heparinised saline (10U/ml)<br>Group 3: heparinised saline (100U/ml)<br>Group 4: heparinised saline (250U/ml)<br>Group 5: heparinised saline (500U/ml) | intraoperative irrigation                                                                                                                                                  | Group 1: 8<br>Group 2: 8<br>Group 3: 8<br>Group 4: 8<br>Group 5: 8 | N.a.                                            | N.a.                  | (8) 100%<br>(5) 62.5%<br>(1) 12.5%<br>(0)<br>(1) 12.5% |
| Engrav et al.            | 1975                | Lower extremity | Total: 2                      | Group 1: control group<br>Group 2: 60IU heparin systemically<br><br>Group 3: magnesium dripped on the anastomosis<br><br>Group 4: 60IU heparin systemically, magnesium dripped on the anastomosis | Group 2: after opening the venous anastomosis<br>Group 3: 20min with the artery being open intermittently and the vein continuously<br><br>Group 4: according to group 2+3 | Group 1: 12<br>Group 2: 11<br><br>Group 3: 10<br><br>Group 4: 11   | (3) 25%<br>(1) 9%<br><br>(4) 40%<br><br>(2) 18% | N.a.                  | N.a.                                                   |
| Ezzat et al.             | 2010                | Lower extremity | Total: 1                      | Group 1: rhTPFI (recombinant human tissue factor pathway inhibitor)<br>Group 2: control group                                                                                                     | Group 1: irrigation with rhTPFI (20µg/mL)<br>Group 2: irrigation with saline                                                                                               | Group 1: 10<br>Group 2: 9                                          | 0<br>(4) 44%                                    | 0<br>(1) 11%          | N.a.                                                   |
| Farina et al.            | 2006                | Lower extremity | Total: 2                      | Group 1: control group<br>Group 2: hemodiluted until hematocrit of +/- 30%<br>Group 3: dextran<br>Group 4: enoxaparin                                                                             | Group 3: 3 doses in an interval of 20min, 5min before surgery<br><br>Group 4: 0.5mg/kg once a day                                                                          | Group 1: 10<br>Group 2: 10<br>Group 3: 10<br>Group 4: 10           | N.a.                                            | N.a.                  | 100%<br>50%<br>90%<br>100%                             |
| Greenberg et al.         | 1988                | Lower extremity | Total: 1                      | Group 1: saline (control group)<br>Group 2: heparin                                                                                                                                               | Group 2: 500µl bolus, 45µl per hour after graft was completed                                                                                                              | Group 1: 30<br>Group 2: 30                                         | (30) 100%<br>(35) 100%                          | 0<br>(1) 3%           | N.a.                                                   |
| Greenberg et al.         | 1991                | Lower extremity | Total: 1                      | Group 1: saline (control group)<br>Group 2: heparin intravenous<br>Group 3: heparin intraarterial                                                                                                 | Group 2: 500µl bolus, 45 units per hour<br>Group 3: 500µl bolus, 25 units per hour                                                                                         | Group 1: 12<br>Group 2: 12<br>Group 3: 11                          | (9) 92%<br>(6) 50%<br>(2) 18%                   | 0<br>(1) 8%<br>(1) 9% | N.a.                                                   |

|                    |      |                                          |                                                                                            |                                                                                                                                                                                                                                                                                                                                                                                                                        |                                                                                                                                                                                                                                              |                                                                         |                                                                                               |             |                   |
|--------------------|------|------------------------------------------|--------------------------------------------------------------------------------------------|------------------------------------------------------------------------------------------------------------------------------------------------------------------------------------------------------------------------------------------------------------------------------------------------------------------------------------------------------------------------------------------------------------------------|----------------------------------------------------------------------------------------------------------------------------------------------------------------------------------------------------------------------------------------------|-------------------------------------------------------------------------|-----------------------------------------------------------------------------------------------|-------------|-------------------|
| Hudson et al.      | 2000 | Lower extremity                          | Total: 1                                                                                   | Group 1: saline (control group)<br>Group 2: 5000IU heparin                                                                                                                                                                                                                                                                                                                                                             | via catheter proximal to the anastomosis                                                                                                                                                                                                     | Group 1: 10<br>Group 2: 10                                              | (10) 100%<br>(9) 90%                                                                          | N.a.        | N.a.              |
| Kirschner et al.   | 1998 | Lower extremity                          | Total: 1                                                                                   | Group 1: control group<br>Group 2: low dose heparin systemically following secondary venous ischemia<br>Group 3: low dose heparin locally into posts ischemic flap                                                                                                                                                                                                                                                     | Group 2 and 3:<br>5-6U/kg/h for 7 days                                                                                                                                                                                                       | Group 1: 9<br>Group 2: 9<br>Group 2: 9                                  | 60.8%<br>62.1%<br>0                                                                           | 0<br>0<br>0 | N.a.              |
| Korompilias et al. | 1996 | Lower extremity                          | Total: 1                                                                                   | Group 1: systemic heparin 2x45IU<br>Group 2: topical heparin 15IU/ml<br>Group 3: topical heparin 45IU/ml<br>Group 4: systemic 2x15IU/ml and topical 15IU/ml heparin<br>Group 5: systemically 2x45IU/ml and topical 45IU/ml heparin                                                                                                                                                                                     | Group 1: systemically<br>Group 2: topical irrigation<br>Group 3: topical irrigation<br>Group 4: systemically and topically<br>Group 5: systemically and topically                                                                            | Group 1: 20<br>Group 2: 20<br>Group 3: 20<br>Group 4: 20<br>Group 5: 20 | (19) 95%<br>(13) 65%<br>(8) 40%<br>(10) 37.5%<br>(4 rats died)<br>(5) 25%                     | N.a.        | N.a.              |
| Lan et al.         | 1992 | Lower extremity                          | Group 1: 1<br>Group 2: 1<br>Group 3: 1                                                     | Group 1: saline<br>Group 2: iloprost<br>Group 3: heparin                                                                                                                                                                                                                                                                                                                                                               | postoperatively                                                                                                                                                                                                                              | Group 1: 48<br>Group 2: 48<br>Group 3: 48                               | N.a.                                                                                          | N.a.        | N.a.              |
| Lepore et al.      | 1994 | Lower extremity                          | Total: 6                                                                                   | Group 1: Prostacyclin 200mg/kg<br>Group 2: Nitrendipine 0.2mg/kg<br>Group 3: Desferrioxamine 20mg/kg<br><br>Group 4: Urokinase 3000U/kg<br><br>Group 5: Streptokinase 3000U/kg<br><br>Group 6: Heparin 200U/kg<br><br>Group 7: Macrodex 80mg/kg<br>Group 8: ATP-MgCl, 20mg/kg<br>Group 9: Mixture PGI2 200ng/kg, Desferrioxamine 20mg/kg, ATP-MgCl 10mg/kg, Macrodex 1ml, Heparin 200 units/kg, Nitrendipine, 0.2mg/kg | intraoperatively                                                                                                                                                                                                                             |                                                                         | Group 1: 65%*<br>Group 2: 62%*<br><br>Group 4: 65%*<br><br><br>Group 9: 87%*<br><br>*survival | N.a.        | N.a.              |
| Li et al.          | 1995 | A./V. femoralis                          | Total: 1                                                                                   | Group 1: heparin (150 units/kg)<br>Group 5: heparin (150 units/kg)<br><br>Group 2-4: no heparin/ex vivo perfusion<br>Group 6: none                                                                                                                                                                                                                                                                                     | Group 1: 10min prior to raising the flap<br>Group 5: after the ischemic period, immediately<br><br>Group 2-4: prior to recirculation of the flap via cannula with heparinised blood                                                          | Group 1: 6<br>Group 5: 6<br>Group 2-4: 3x6<br><br>Group 6: 6            | 100%<br>100%<br>100%<br><br>66.6%                                                             | N.a.        | N.a.<br><br>33.3% |
| Maeda et al.       | 1990 | A./V. epigastrica<br><br>A./V. femoralis | Group 1a: 0<br>Group 2a: 2<br>Group 3a: 0<br><br>Group 4a: 0<br>Group 1b: 0<br>Group 2b: 2 | Group 1: none<br>Group 2: heparin, urokinase<br>Group 3: Ringer Lactat<br><br>Group 4: SOD, Catalase, Ringer Lactat<br>Group 1b: none<br>Group 2b: heparin, urokinase                                                                                                                                                                                                                                                  | 30min before reperfusion after 10h<br><br>30min before reperfusion after 10h<br>30min before reperfusion after 10h<br><br>30min before reperfusion after 10h<br>30min before reperfusion after 12h<br><br>30min before reperfusion after 12h | 12<br><br>10<br>10<br><br>Group 4a: 10<br>Group 1b:10<br><br>10         | 46%<br><br>0%<br>32%<br><br>47%<br>87%<br><br>73%                                             | N.a.        | N.a.              |

|                  |      |                                                       |                                                                                                |                                                                                                                                                                                              |                                                                                                                |                                                                                                       |                                                 |      |      |
|------------------|------|-------------------------------------------------------|------------------------------------------------------------------------------------------------|----------------------------------------------------------------------------------------------------------------------------------------------------------------------------------------------|----------------------------------------------------------------------------------------------------------------|-------------------------------------------------------------------------------------------------------|-------------------------------------------------|------|------|
|                  |      |                                                       | Group 3b: 0<br>Group 4b: 0<br>Group 5b: 2                                                      | Group 3b: Ringer Lactat<br>Group 4b: SOD, Catalase, Ringer Lactat<br>Group 5b: heparin, urokinase, SOD, Catalase, Ringer Lactat                                                              | 30min before reperfusion after 12h<br>30min before reperfusion after 12h<br>30min before reperfusion after 12h | 10<br>10<br>10                                                                                        | 84%<br>64%<br>5%                                |      |      |
| Mayer et al.     | 1990 | V. axillaris<br>V. jugularis int.<br>V. subscapularis | Group 1: 1<br>Group 2: 0                                                                       | heparin coated                                                                                                                                                                               | on surface of interposition connectors                                                                         | Group 1: 20 anastomosis in 6 pigs<br>Group 2: 30 anastomosis in 7 pigs                                |                                                 |      |      |
| Murthy et al.    | 2003 | A./V. epigastrica inf.                                | Group 1: 0<br>Group 2: 1<br>Group 3: 1<br>Group 4: 2                                           | control group<br>pentoxifylline<br>LMWH<br>combined therapy (pentoxifylline and LMWH)                                                                                                        | Group 2: 24mg/kg/day<br>Group 3: 1.5mg/kg/day                                                                  | Group 1: 15<br>Group 2: 15<br>Group 3: 15<br>Group 4: 15                                              | 66.67%<br>26.67%<br>26.67%<br>20%               | N.a. | N.a. |
| Narayanan et al. | 1991 | A.femoralis<br><br>V.femoralis                        | Group 1: 0<br>Group 2: 1<br>Group 3: 1<br>Group 1: 0<br>Group 2: 1<br>Group 3: 1               | saline<br>heparin 1mg/ml in saline<br>hirudin 1µg/ml in saline<br>saline<br>heparin 1mg/ml in saline<br>hirudin 1µg/ml in saline                                                             | intraoperatively                                                                                               | Group 1: 25<br>Group 2: 25<br>Group 3: 25<br>Group 1: 10<br>Group 2: 10<br>Group 3: 10                | 20%<br>16%<br>8%<br>40%<br>50%<br>20%           | N.a. | N.a. |
| Ozbeck et al.    | 1994 | Ear                                                   | Group 1: 1<br>Group 2: 1<br>Group 3: 0                                                         | Group 1: rhTPFI 40µg/ml<br>Group 2: heparin 50U/ml<br>Group 3: control buffer (saline)                                                                                                       | intraoperatively, intraluminal                                                                                 | Group 1: 30<br>Group 2: 10<br>Group 3: 20                                                             | 3%<br>40%<br>80%                                | N.a. | N.a. |
| Ramelli et al.   | 2019 | cervical, femoral, tail                               | Group 1: 0<br>Group 2: 1                                                                       | Group 1: saline<br>Group 2: UFH 5000UI/ml                                                                                                                                                    | intraoperatively, intraluminal                                                                                 | Group 1: 125<br>Group 2: 122                                                                          | 25%<br>13%                                      | N.a. | N.a. |
| Reichel et al.   | 1987 | A. femoralis                                          | Group 1: 0<br>Group 2: 1<br>Group 3: 1<br>Group 4: 1<br>Group 5: 1<br>Group 6: 3<br>Group 7: 3 | Group 1: Ringer solution<br>Group 2: heparin<br>Group 3: phentolamin<br>Group 4: urokinase<br>Group 5: TPA<br>Group 6: TPA, phentolamin, heparin<br>Group 7: heparin, urokinase, phentolamin | intraoperatively, intraluminal                                                                                 | Group 1: 40<br>Group 2: 40<br>Group 3: 20<br>Group 4: 20<br>Group 5: 40<br>Group 6: 40<br>Group 7: 20 | 90%<br>55%<br>65%<br>50%<br>85%<br>57.5%<br>45% | N.a. | N.a. |
| Ritter et al.    | 1998 | A./V. femoralis                                       | Group 1: 0<br>Group 2: 1<br>Group 3: 1                                                         | Group 1: Ringer solution<br>Group 2: 100U/kg UFH in 1ml of saline<br>Group 3: 1mg LMWH in 1ml of saline                                                                                      | intraoperatively                                                                                               | Group 1: 15<br>Group 2: 15<br>Group 3: 15                                                             | 33.33%<br>13.33%<br>0%                          | N.a. | N.a. |
| Rumbolo et al.   | 1991 | A./V. femoralis                                       | Group 1: 0<br>Group 2: 1<br>Group 3: 1                                                         | Group 1: Ringer solution<br>Group 2: Ringer with 20U/ml heparin<br>Group 3: Ringer with 500U/ml urokinase                                                                                    | intraoperatively, intraluminal                                                                                 | Group 1: 16<br>Group 2: 16<br>Group 3: 16                                                             | 27%<br>33%<br>43%                               | N.a. | N.a. |
| Sinclair         | 1980 | A./V. femoralis                                       | Group 1: 1<br>Group 2a: 0<br>Group 2b: 1<br>Group 3: 1                                         | Group 1: heparinised saline irrigation<br>Group 2a: saline irrigation and saline SC<br>Group 2b: saline irrigation and heparin SC<br>Group 3: heparinised saline irrigation                  | intraoperatively<br>pre-, intra- and postoperatively<br>pre-, intra- and postoperatively<br>intraoperatively   | Group 1: 10<br>Group 2: 5<br>Group 3: 5<br>Group 4: 10                                                | 20%<br>100%<br>100%<br>30%                      | N.a. | N.a. |

|                     |      |                  |                                                      |                                                                                                                                        |                                                           |                                                          |                          |                      |      |      |
|---------------------|------|------------------|------------------------------------------------------|----------------------------------------------------------------------------------------------------------------------------------------|-----------------------------------------------------------|----------------------------------------------------------|--------------------------|----------------------|------|------|
| Vlastou et al.      | 1983 | Ear replantation | Group 1: 1<br>Group 2: 0                             | Group 1: heparin 1000UI IV<br>Group 2: none                                                                                            | Intraoperatively                                          | Group 1: 27<br>Group 2: 27                               | 26%<br>66%               | 3.70%<br>N.a.        | N.a. |      |
| Wallmichrath et al. | 2015 | Groin to Neck    | Group 1: 0<br>Group 2: 0<br>Group 3: 1<br>Group 4: 1 | Group 1: None<br>Group 2: 1ml Ringer over 10min<br>Group 3: 1ml heparin (100IU/kg) over 10min<br>Group 4: 1ml rtPA (2mg/kg) over 10min | Intraoperatively, intra-arterial                          | Group 1: 10<br>Group 2: 10<br>Group 3: 10<br>Group 4: 10 | 90%<br>90%<br>20%<br>40% | N.a.                 | N.a. |      |
| Wallmichrath et al. | 2014 | Groin to Neck    | Group 1: 0<br>Group 2: 1                             | Group 1: 1ml Ringer<br>Group 2: 1ml Antithrombin (50UI/kg)                                                                             | Intraoperatively, intra-arterial over 10min               | Group 1: 11<br>Group 2: 11                               | 81.81%<br>27%            | N.a.                 | N.a. |      |
| Wolfort et al.      | 1992 | A./V. femoralis  | Group 1: 0<br>Group 2: 1                             | Group 1: 17cc/kg saline IV<br>Group 2: 1gm dextran 70                                                                                  | 30min preoperatively and every 8h for 72h postoperatively | Group 1: 8<br>Group 2: 7                                 | 75%<br>0%                | N.a.                 | N.a. |      |
| Yates et al.        | 2002 | A./V. femoralis  | Group 1: 0<br>Group 2: 1<br>Group 3: 1<br>Group 4: 2 | Group 1: Ringer<br>Group 2: tirofiban (50µg/ml),<br>Group 3: heparin (100U/ml),<br>Group 4: heparin (100U/ml) and tirofiban (50g/ml)   | intraoperatively, intraluminal                            | Group 1: 20<br>Group 2: 22<br>Group 3: 10<br>Group 4: 10 | 90%<br>41%<br>80%<br>20% | 20<br>22<br>10<br>10 | N.a. | N.a. |
