# Supplementary material for: Evidence-Based Approaches to Anticoagulation in Reconstructive Microsurgery—A Systematic Literature Review
Source: MDPI journal article supplement (doi:10.3390/life14010082), 2024-01-03
Supplement: s1 [file s1]

| 1st Author        | Year of Publication | Recipient Site | Number of anticoagulants used | Medication/method of administration | Time of application | Number of participants/ Flaps | Age, y | Sex (male/ female) | Flap Loss- Total (*) % | Revision surgery (*) % | Hemato- ma (*) % | Overall Compli- cation Rate (*) % | CMS | Summary                                                                                                                                                                                                                                                            |
|-------------------|---------------------|----------------|-------------------------------|-------------------------------------|---------------------|-------------------------------|--------|--------------------|------------------------|------------------------|------------------|-----------------------------------|-----|--------------------------------------------------------------------------------------------------------------------------------------------------------------------------------------------------------------------------------------------------------------------|
| Metaanalysis      |                     |                |                               |                                     |                     |                               |        |                    |                        |                        |                  |                                   |     |                                                                                                                                                                                                                                                                    |
| Pan et al.        | 2014                |                |                               |                                     |                     |                               |        |                    |                        |                        |                  |                                   | 73  | No significant difference in flap loss rate between heparin and ASA; high dose dalteparin or heparin associated with a greater flap loss rate than low dose.                                                                                                       |
| Swartz et al.     | 2015                |                |                               |                                     |                     |                               |        |                    |                        |                        |                  |                                   | 77  | Studied anticoagulants do not improve free flap survival, in addition some anticoagulative drugs may cause systemic complications.                                                                                                                                 |
| Systematic Review |                     |                |                               |                                     |                     |                               |        |                    |                        |                        |                  |                                   |     |                                                                                                                                                                                                                                                                    |
| Abraham et al.    | 2008                | Head, neck     |                               |                                     |                     |                               |        |                    |                        |                        |                  |                                   | 71  | Subcutaneous heparin and ASA are commonly combined, but the combination also increases the rate of complications. ASA as single-agent does not increase flap survival. Recent studies show higher benefit, safety, and decreased risk of bleeding with LMWH alone. |
| Cevik et al.      | 2021                |                |                               |                                     |                     |                               |        |                    |                        |                        |                  |                                   | 81  | LMWH and Heparin are                                                                                                                                                                                                                                               |

|                |      |                           |  |  |  |  |  |  |  |  |  |  |    |                                                                                                                                                                                                    |
|----------------|------|---------------------------|--|--|--|--|--|--|--|--|--|--|----|----------------------------------------------------------------------------------------------------------------------------------------------------------------------------------------------------|
|                |      |                           |  |  |  |  |  |  |  |  |  |  |    | equivalent as prophylaxis. Heparin administered three times daily should be considered.                                                                                                            |
| Couteau et al. | 2021 |                           |  |  |  |  |  |  |  |  |  |  | 72 | Intraoperative systemic heparin does not improve flap survival. Ex vivo administration of intraoperative irrigation with heparinized serum during cold ischemia time, improves free flap survival. |
| Lin et al.     | 2020 | Digital replanta-<br>tion |  |  |  |  |  |  |  |  |  |  | 71 | No benefit LMWH vs UFH concerning success rates of replantation. Similar rates of complications and adverse effects. No difference in anastomosis sufficiency between LMWH and no LMWH.            |
| Liu et al.     | 2017 | Head,<br>neck             |  |  |  |  |  |  |  |  |  |  | 63 | No significant difference between postop. anticoagulation therapy and flap loss rate/thromboembolic event. Postoperative anticoagulation therapy may increase the                                  |

|                |      |  |  |  |  |  |  |  |  |  |  |  |    |                                                                                                                                                                                                                                             |
|----------------|------|--|--|--|--|--|--|--|--|--|--|--|----|---------------------------------------------------------------------------------------------------------------------------------------------------------------------------------------------------------------------------------------------|
|                |      |  |  |  |  |  |  |  |  |  |  |  |    | risk of hematoma                                                                                                                                                                                                                            |
| Prsic et al.   | 2015 |  |  |  |  |  |  |  |  |  |  |  | 51 | Anticoagulation with ASA, heparin and dextrane described in literature. No consensus about the ideal regimen. Use of statin perioperatively could be beneficial.                                                                            |
| Sigaux et al.  | 2017 |  |  |  |  |  |  |  |  |  |  |  | 45 | No significant difference in flap outcome or complication rate between the common anticoagulatives. Important: Monitoring of blood results (HIT) and individual regimen                                                                     |
| Spiegel et al. | 2007 |  |  |  |  |  |  |  |  |  |  |  | 50 | LMW-dextran: higher morbidity caused by pulmonary edema, nephrotoxicity, acute respiratory distress syndrome, severe anaphylactic reaction. intravenous heparin: increased risk of hematoma, heparin subcutaneous same risk as no anticoag. |

|                             |      |                 |                          |                                                                                                                                                                                                                                    |                                                                       |                                              |                                        |                          |                                    |                        |                                    |                                 |    |                                                                                              |
|-----------------------------|------|-----------------|--------------------------|------------------------------------------------------------------------------------------------------------------------------------------------------------------------------------------------------------------------------------|-----------------------------------------------------------------------|----------------------------------------------|----------------------------------------|--------------------------|------------------------------------|------------------------|------------------------------------|---------------------------------|----|----------------------------------------------------------------------------------------------|
|                             |      |                 |                          |                                                                                                                                                                                                                                    |                                                                       |                                              |                                        |                          |                                    |                        |                                    |                                 |    | ASA: no increased risk for complications compared with patients receiving no anticoagulant.  |
| Trull et al.                | 2021 |                 |                          |                                                                                                                                                                                                                                    |                                                                       |                                              |                                        |                          |                                    |                        |                                    |                                 | 44 | Mostly used anticoagulation : ASA alone or in combination with UFH/LMWH. No clear consensus. |
| Randomized Controlled Trial |      |                 |                          |                                                                                                                                                                                                                                    |                                                                       |                                              |                                        |                          |                                    |                        |                                    |                                 |    |                                                                                              |
| Disa et al.                 | 2013 | Head, neck      | Total: 3 (1 each group)  | Group 1: low-molecular-weight dextran<br>Group 2: low-molecular-weight dextran<br>Group 3: ASA                                                                                                                                     | 48h postoperatively<br>120h postoperatively<br>5 days postoperatively | Group 1: 35<br>Group 2: 32<br>Group 3: 27    | 58<br>59<br>57                         | 54/46<br>72/28<br>63/37  | 0<br>0<br>0                        | 0<br>2 (6.2%)<br>0     | N.a.<br>N.a.<br>N.a.               | 7 (20%)<br>2 (6.2%)<br>2 (7.4%) | 83 |                                                                                              |
| Jones et al.                | 2007 | mixed           | Total: 2                 | Group 1: 200µg/ml milrinone bolus<br>Group 2: saline infusion                                                                                                                                                                      | intraoperatively                                                      | Group 1: 43<br>Group 2: 45                   | 51 (18-80)<br>51 (20-78)               | 17/26<br>17/28           | (1) 2%<br>(1) 2%                   | (10) 23%<br>(7) 16%    | (5) 11%<br>(4) 9%                  | N.a.                            | 73 |                                                                                              |
| Khoury et al.               | 2001 | mixed           | Total: 2                 | Group 1: 0.05mg/ml rhIFPI<br>Group 2: 0.15mg/ml rhIFPI<br>Group 3: 100hU/ml heparin                                                                                                                                                | intraluminal irrigation                                               | Group 1: 216<br>Group 2: 204<br>Group 3: 202 | 47 (17-89)<br>45 (18-88)<br>46 (18-84) | 61/39<br>60/40<br>59/41  | (4) 1.9%<br>(13) 6.4%<br>(10) 5.0% | 10.4 %<br>9.3%<br>7.9% | (7) 3.2%<br>(17) 7.8%<br>(18) 8.9% | N.a.                            | 76 |                                                                                              |
| Prospective Cohort Study    |      |                 |                          |                                                                                                                                                                                                                                    |                                                                       |                                              |                                        |                          |                                    |                        |                                    |                                 |    |                                                                                              |
| Ashjian et al.              | 2007 | mixed           | Group 1: 1<br>Group 2: 1 | Group 1: 325mg of ASA<br>Group 2: 5000 units LMWH                                                                                                                                                                                  | daily for 5 days<br>daily until ambulating                            | 245/260<br>225/245                           | 57 (10-102)<br>54 (3-89)               | 101/144<br>102/123       | (1) 0.4%<br>(2) 0.8%               | N.a.<br>N.a.           | (6) 2.3%<br>(5) 2%                 | 37.7<br>44                      | 75 |                                                                                              |
| Bashir et al.               | 2014 | mixed           | Total: 1                 | Group 1: 5000 units of heparin IV, no heparin given postoperatively<br>Group 2: 5000 units of heparin IV per operatively, 1000 units of heparin IV per hour were given postoperatively                                             | intraoperatively<br>Intra- and post-operatively                       | Group 1: 16<br>Group 2: 15                   | 29.93<br>35.53                         | 2,7:1 ratio<br>4:1 ratio | (3) 19%<br>(4) 23%                 | 1<br>2                 | (2) 12.5%<br>(5) 33.3%             | N.a.<br>N.a.                    | 72 |                                                                                              |
| Fukui et al.                | 1987 | Upper extremity | Total: 1                 | IV infusion via Teflon catheter inserted into proximal main artery of the anastomosis, daily dose of 80ml comprising 240.000U of urokinase, 40µg of prostaglandin E, 10.000U (maximum) of heparin and low molecular weight dextran | continuous infusion for the 10 consecutive days                       | 15                                           | N.a.                                   | N.a.                     | 0                                  | N.a.                   | N.a.                               | N.a.                            | 32 |                                                                                              |
| Furnas et al.               | 1992 | Head, neck      | Total 3:                 |                                                                                                                                                                                                                                    | Total: 55                                                             | N.a.                                         |                                        | N.a.                     | N.a.                               | N.a.                   | N.a.                               | N.a.                            | 42 |                                                                                              |

|                        |      |                           |                                                                    |                                                                                                                                                                                                                                                                                      |                                                                                                                     |                                                                           |                                             |                       |                                                          |                                                                   |                                                       |                                                           |    |  |
|------------------------|------|---------------------------|--------------------------------------------------------------------|--------------------------------------------------------------------------------------------------------------------------------------------------------------------------------------------------------------------------------------------------------------------------------------|---------------------------------------------------------------------------------------------------------------------|---------------------------------------------------------------------------|---------------------------------------------|-----------------------|----------------------------------------------------------|-------------------------------------------------------------------|-------------------------------------------------------|-----------------------------------------------------------|----|--|
|                        |      |                           |                                                                    | Group 1: 325mg ASA, dextran<br>Group 2: 325mg ASA, heparin<br>Group 3: 325mg ASA, dextran replaced by heparin<br>Group 4: 325mg ASA, dextran, leeches<br>Group 5: 325mg ASA, extran, heparin<br>Group 6: 325mg ASA, heparin, leeches<br>Group 7: 325mg ASA, heparin, dextra, leeches | Group 1: 28<br>Group 2: 8<br>Group 3: 4<br>Group 4: 5<br>Group 5: 5<br>Group 6: 2<br>Group 7: 3                     |                                                                           | 3%<br>25%<br>30%<br>27%<br>25%<br>40%<br>0% |                       |                                                          |                                                                   |                                                       |                                                           |    |  |
| Lighthall et al.       | 2011 | Upper and lower extremity | Group 1: 1<br>Group 2: 1<br>Group 3: 1<br>Group 4: 2<br>Group 5: 0 | Group 1: ASA<br>Group 2: heparin<br>Group 3: heparin drip<br>Group 4: heparin and ASA<br>Group 5: none                                                                                                                                                                               | N.a.                                                                                                                | Group 1: 142<br>Group 2: 25<br>Group 3: 15<br>Group 4: 23<br>Group 5: 184 | 64.3                                        | 193/197               | (7) 4.9%<br>(2) 8%<br>(5) 31.3%<br>(1) 4.4%<br>(10) 5.4% | N.a.                                                              | (10) 7.04%<br>(6) 24%<br>(5) 33.33%<br>0<br>(7) 3.80% | (57) 40%<br>(12) 48%<br>(21) 100%<br>(15) 65%<br>(45) 24% | 48 |  |
| Saito et al.           | 2009 | Lower extremity           | Total: 1                                                           | 2000IU of heparin and 4lg of PGE1                                                                                                                                                                                                                                                    | continuous through catheter for 7 days                                                                              | 11                                                                        | 46.8                                        | 5/6                   | 0%                                                       | 0%                                                                | 9.09%                                                 | 36.36%                                                    | 60 |  |
| Başaran et al.         | 2021 | Head, neck                | Group 1: 2<br>Group 2: 1                                           | Group 1: enoxaparin 2x4000IU, ASA 1x100mg<br>Group 2: enoxaparin 6000IU                                                                                                                                                                                                              | N.a.<br>N.a.                                                                                                        | Total: 124<br>Group 1: 63<br>Group 2: 61                                  | 45.9<br>(14–72)                             | 67/57<br>N.a.<br>N.a. | (3) 0.05%<br>(0) 0%                                      | (22) 17.7%<br>(15) 24%<br>(6) 9.8%                                | (18) 14.5%<br>(12) 19%<br>(6) 9.8%                    | N.a.                                                      | 63 |  |
| Bassiri-Tehrani et al. | 2018 | Breast                    | Total: 2                                                           | Group 1: preoperative chemoprophylaxis, 40mg enoxaparin SC and additionally 81mg ASA<br>Group 2: postoperative chemoprophylaxis, enoxaparin SC and additionally 81mg ASA                                                                                                             | intraoperatively, until ambulating early postoperatively<br>postoperatively, until ambulating early postoperatively | Group 1: 105/166<br>7 of Group 1<br>Group 2: 91/145<br>29 of Group 2      | 51.4<br>48.1                                | N.a.                  | N.a.                                                     | N.a.                                                              | (4) 4.4%<br>(1) 1%                                    | (4) 3.8%<br>(6) 6.7%                                      | 53 |  |
| Efanov et al.          | 2018 | Upper extremity           | Total: 2                                                           | Group 1: 80mg ASA and heparin IV<br>Group 2: 80mg ASA and heparin IV<br>Group 3: 80mg ASA and heparin IV                                                                                                                                                                             | ASA daily, heparin for ≤ 7 days<br>heparin for 7-14 days<br>heparin for ≥ 15 days                                   | Total: 108/163<br>36<br>67<br>5                                           | 48 (16-76)                                  | 96/12                 | 16 (44.4%)<br>24 (35.8%)<br>3 (60.0%)                    | N.a.<br>N.a.<br>N.a.                                              | N.a.<br>N.a.<br>N.a.                                  | N.a.<br>N.a.<br>N.a.                                      | 65 |  |
| Eley et al.            | 2013 | Head, neck                | Total: 2                                                           | Group 1: 2500IU Dalteparin, 75mg ASA<br>Group 2: 2500IU Dalteparin<br>Group 3: 5000IU Dalteparin, 75mg ASA<br>Group 4: 5000IU Dalteparin<br>Group 5: 5000IU Dalteparin, 75mg ASA<br>Group 6: 5000IU Dalteparin<br>Group 7: 7500IU Dalteparin, 75mg ASA<br>Group 8: 7500IU Dalteparin | once a day<br>once a day<br>once a day<br>once a day<br>twice a day<br>twice a day<br>once a day<br>once a day      | Total: 173<br>5<br>2<br>78<br>29<br>22<br>15<br>15<br>5                   | N.a.                                        | 101/72                | N.a.                                                     | 0<br>0<br>(4) 5.1%<br>(1) 3.4%<br>(1) 4.5%<br>0<br>(2) 13.3%<br>0 | 0<br>0<br>(3) 3.8%<br>(1) 3.4%<br>(2) 9.0%<br>0<br>0  | N.a.                                                      | 76 |  |
| Enajat et al.          | 2014 | Breast                    | Total: 2                                                           | Group 1: 0.6ml nadroparine and 40mg ASA<br>Group 2: 0.6ml nadroparine                                                                                                                                                                                                                | nadroparine until discharge, ASA daily for 6 weeks postoperatively                                                  | Total: 430/592<br>Group 1: 261<br>Group 2: 169                            | 47.5<br>47.8                                | 0/261<br>0/169        | 2.8%<br>2.5%                                             | N.a.                                                              | 9.2%<br>4.7%                                          | 28.0<br>32.3                                              | 66 |  |

|                   |      |                 |                                |                                                                                                                                                                                                  |                                                                                                                                                                                   |                                                        |                      |                          |                                                                   |                                      |                          |                          |    |  |
|-------------------|------|-----------------|--------------------------------|--------------------------------------------------------------------------------------------------------------------------------------------------------------------------------------------------|-----------------------------------------------------------------------------------------------------------------------------------------------------------------------------------|--------------------------------------------------------|----------------------|--------------------------|-------------------------------------------------------------------|--------------------------------------|--------------------------|--------------------------|----|--|
| Filipan et al.    | 2020 | Head, neck      | Total: 2                       | Group 1: dextran 40, 500mL/24 hours, dalteparin 5000IU daily<br>Group 2: dalteparin 5000IU daily                                                                                                 | dextran 40 for 1-6 days, dalteparin for an average of 7 days                                                                                                                      | Total: 168/176<br>Group 1: 97<br>Group 2: 79           | 59.9<br>58.8<br>61.3 | 118/58<br>69/28<br>49/30 | 16<br>10<br>6                                                     | 27<br>(13) 13.4%<br>(14) 17.7%       | (11) 11.3%<br>(3) 3.8%   | (13) 13.4%<br>(10) 12.7% | 66 |  |
| Jayaorasad et al. | 2013 | Head, neck      | Total: 1                       | Group 1: 50g dextran 40, LMWH<br>Group 2: LMWH only                                                                                                                                              | dextran 40 for daily for 5 days postoperatively, LMWH 0.2cc SC daily for 5 days or until ambulation                                                                               | Total: 169<br>Group 1: 86<br>Group 2: 82               | 55.6<br>(18-85)      | 62/24<br>57/25           | (3) 3.5%<br>(2) 2.3%                                              | (26) 15.4%<br>(12) 14%<br>(14) 16.3% | (5) 5.8%<br>(2) 2.4%     | N.a.                     | 74 |  |
| Keith et al.      | 2013 | Breast          | Total: 1                       | Group 1: only postoperative enoxaparin 1x40mg or 2x30mg daily<br>Group 2: preoperative and postoperative 30mg enoxaparin SC                                                                      | Group 1: postoperatively daily until ambulation<br>Group 2: within 1 hour before incision, postoperatively according to group 1                                                   | Group 1: 58<br>Group 2: 89                             | N.a.                 | N.a.                     | N.a.                                                              | (1) 1.7%<br>(3) 3.4%                 | (2) 3.4%<br>(5) 5.6%     | N.a.                     | 71 |  |
| Kelly et al.      | 2004 | mixed           | Total: 3                       | Group 1: LMWH<br>Group 2: no anticoagulation<br>Group 3: dextran<br>Group 4: systemic heparin                                                                                                    | Group 3: 3-5 days<br>Group 4: 3-5 days                                                                                                                                            | Group 1: 39<br>Group 2: 10<br>Group 3: 6<br>Group 4: 4 | N.a.                 | N.a.                     | (5) 12%<br>(4) 0.4% *<br>0<br>0<br>*(total and partial flap loss) | N.a.                                 | N.a.                     | N.a.                     | 55 |  |
| Labovsky et al.   | 1991 | Lower extremity | Group 1: 3<br><br>Group 2: 3   | Group 1: 625mg ASA supp<br>5000IE Heparin IV<br>Dextran IV<br>625mg ASA<br><br>Group 2: 625mg ASA supp<br>Heparin IV venous catheter in anastomosis (5IE/cc, 50cc/hr)<br>Dextran IV<br>625mg ASA | preoperatively<br>intraoperatively<br>3 days postoperatively<br>postoperatively<br><br>preoperatively<br>3 days intraoperatively<br><br>3 days postoperatively<br>postoperatively | 41<br><br><br><br>36                                   |                      | 0<br><br>(1) 6.67 %      |                                                                   | (8) 61.54%<br><br>(1) 6.67%          | N.a.<br><br>             | N.a.<br><br>             | 53 |  |
| Lee et al.        | 2012 | Lower extremity | Group 1: 2<br><br>Group 2: 1   | Group 1: prostaglandin E1 10µg, Keterolac 30mg IV 1-1-1<br>Group 2: prostaglandin E1 10µg                                                                                                        | 7 days postoperatively<br>2 days postoperatively<br>7 days postoperatively                                                                                                        | Group 1: 80<br><br>Group 2: 48                         | 45.5<br><br>48       | 54/26<br><br>25/23       | (1) 1.3%<br><br>(1) 2.1%                                          | (4) 5%<br><br>(8) 16.7%              | (1) 1.3%<br><br>(3) 6.3% | (7) 8%<br><br>(12) 25%   | 68 |  |
| Luthringer et al. | 2022 | Head, neck      | Group 1: 1<br><br>Group 2: 1-2 | Group 1: 15mg ketorolac<br><br>Group 2: ASA 100 (some) LMWH                                                                                                                                      | Group 1: intraoperatively (time of anastomosis), every 6 hours thereafter for max. 5 days<br>Group 2: daily                                                                       | Group 1: 18<br><br>Group 2: 6                          | 63.2<br><br>59.7     | 12/6<br><br>5/1          | 0<br><br>0                                                        | 0<br><br>0                           | 0<br><br>0               | N.a.                     | 55 |  |
| Mirzabeigi et al. | 2012 | mixed           | Total: 1                       | LMWH 5000IE<br>some unclear                                                                                                                                                                      | intraoperatively                                                                                                                                                                  | 47                                                     | 51.2                 | N.a.                     | 51%                                                               | 100%                                 | N.a.                     | N.a.                     | 41 |  |
| Numajiri et al.   | 2016 | Head, neck      | Group 1: 1<br><br>Group 2: 0   | Group 1: continuous IV UFH (5000–10 000 units/d)<br>Group 2: none/control                                                                                                                        | 7d postoperatively                                                                                                                                                                | Group 1: 121<br>Group 2: 62                            | 60.6<br>61.9         | 92/29<br>57/5            | 3.3%<br>1.6%                                                      | 4.1%<br>1.6%                         | 8%<br>0%                 | N.a.                     | 79 |  |
| Okochi et al.     | 2019 | Lower extremity | Total: 1                       | Group 1: heparin 5.000-10.000IU/d (arterial catheter)<br>Group 2: 50% of the initial dose<br>Group 3: 25% of the initial dose of heparin                                                         | until 2.POD<br><br>until 4.POD<br>until 6.POD                                                                                                                                     | 15                                                     | 55.1                 | 10/5                     | 0%                                                                | N.a.                                 | 33.33%                   | N.a.                     | 53 |  |

[illegible]

[illegible]
